# Supplementary material for: Comparative genomics of the Campylobacter genus: Insights into phylogenomics, virulence, genome plasticity and resistome profiling
Source: Research Square preprint supplement (doi:10.21203/rs.3.rs-7771926/v1), 2025-10-25
Supplement: Supplementary file 1 [file c10c6b4cbfc11f4adfbc48fa.docx]

**Comparative genomics of the *Campylobacter* genus: Insights into phylogenomics, virulence, genome plasticity and resistome profiling**

**Journal: International Microbiology**

**Twinkle Yadav, Charu Tripathi***

[charutripathi89@gmail.com](mailto:charutripathi89@gmail.com), Corresponding author

Department of Zoology, C.M.P. College, University of Allahabad, Prayagraj, India

**Table 1. (SI)** Type VI secretion system proteins identified in *Campylobacter* genus.

| **SN** | **Species** | **Type VI secretion System** | **Type VI secretion System Proteins** |
| --- | --- | --- | --- |
| 1 | *C. jejuni* | Present | 1. ClpB protein – proteolysis in bacteria, ATP dependent , Protein chaperons |
| 2 | *C. portucalensis* | Absent | - |
| 3 | *C. armoricus* | Absent | - |
| 4 | *C. aviculae* | Present | 1. Type VI secretion lipoprotein/ VasD 2. Outer membrane protein lmpk/VasF, OmpA/ MotB domain 3. Uncharacterized protein ImpJ/VasE 4. Uncharacterized protein ImpA 5. Uncharacterized protein ImpB 6. Uncharacterized protein ImpC 7. Uncharacterized protein similar to VCA0109 8. Protein ImpG/VasA 9. Uncharacterized protein ImpH/VasB |
| 5 | *C. avium* | Present | 1. Type VI secretion system protein TSSA 2. Type VI secretion system contractile sheath small subunit TssB 3. Type VI secretion system contractile sheath large subunit TssC 4. Hcp fa,mily type VI secretion system effector 5. Type VI secretion system baseplate subunit TssF 6. Type VI secretion system baseplate subunit TssG 7. Type VI secretion system ATPase TSSH 8. Type VI secretion system baseplate subunit TssK 9. Type VI secretion protein IcmF/ TssMN- terminal domain containing protein |
| 6 | *C. blaseri* | Absent | - |
| 7 | *C. canadensis* | Absent | - |
| 8 | *C. coli* | Present | 1. IcmF related protein-Type VI secretion system 2. Hcp protein 3. Outer membrane protein Impk/VasF OMPA/MotB domain 4. Uncharacterized protein ImpJ/VasE 5. Type VI secretion lipoprotein VasD 6. Uncharacterized protein ImpA 7. Uncharacterized protein ImpB 8. Uncharacterized protein ImpC 9. Protein ImpG/VasB 10. VgrG protein 11. Uncharacterized protein ImpH/VasB 12. VgrG protein 13. Type VI secretion system membrane subunit TSSM 14. Type VI secretion system baseplate subunit TSSK 15. Type VI secretion lipoprotein TSSJ 16. Type VI secretion system contractile sheath small subunit 17. Type VI secretion system contractile sheath large subunit 18. Type VI secretion system baseplate subunit TSSF 19. Type VI secretion system TssG 20. Type VI secretion system Vgr family protein |
| 9 | *C. consisus* | Present | 1. Type VI secretion lipoprotein / VasD 2. Uncharacterized protein ImpJ/NasE 3. Outer membrane protein Impk/VasF, OmpA/MotB 4. Uncharacterized protein ImpA 5. Uncharacterized protein ImpB 6. Uncharacterized protein ImpC 7. Uncharacterized protein similar to VCA0109 8. Protein ImpG/VasA 9. Uncharacterized protein ImpH/VasH 10. IcmF related protein 11. Type VI secretion system lipoprotein TssJ 12. Type VI secretion system baseplate subunit TssK 13. Type VIB secretion system protein IcmH/DotU 14. Type VI secretion system contractile sheath small subunit 15. Type VI secretion system contractile sheath large subunit 16. Type VI secretion system baseplate subunit TSSF 17. Type VI secretion system membrane subunit TSSM 18. HcP family type VI secretion system effector 19. Type VI secretion system Vgr family protein |
| 10 | *C. corcagiensis* | Absent | - |
| 11 | *C. cuniculorum* | Present | 1. Type VI secretion system membrane subunit TSSM 2. HcP family type VI secretion system effector 3. Type VI secretion system baseplate subunit TssK 4. Type VI secretion system lipoprotein TssJ 5. Type VI secretion domain containing protein 6. Type VI secretion system contractile sheath small subunit 7. Type VI secretion system contractile sheath large subunit 8. Type VI secretion system baseplate subunit TssE 9. Type VI secretion system baseplate subunit TssF 10. Type VI secretion system baseplate subunit TssG 11. Type VI secretion system Vgr family protein 12. Type VI secretion IcmF c-terminal domain containing protein |
| 12 | *C. curvus* | Absent | - |
| 13 | *C. estrildidarum* | Absent | - |
| 14 | *C. fetus* | Absent | - |
| 15 | *C. geochelonsis* | Absent | - |
| 16 | *C. gracillis* | Present | 1. ClB protein- proteolysis in bacteria protein chaperones type VI secretion system |
| 17 | *C. helveticus* | Present | 1. Type VI secretion system Vgr family protein 2. Type VI secretion system membrane subunit TSSM 3. HcP family type VI secretion system effector 4. Type VIB secretion system protein IcmH/DotU 5. Type VI secretion system baseplate subunit TssK 6. Type VI secretion system lipoprotein TssJ 7. Type VI secretion domain containing protein 8. Type VI secretion system contractile sheath small subunit 9. Type VI secretion system contractile sheath large subunit 10. Type VI secretion system baseplate subunit TssE 11. Type VI secretion system baseplate subunit TssF 12. Type VI secretion system baseplate subunit TssG |
| 18 | *C. hepaticus* | Absent | - |
| 19 | *C. hominis* | Absent | - |
| 20 | *C. hyointestinalis* | Absent | - |
| 21 | *C. iguaniorum* | Absent | - |
| 22 | *C. insulanigrae* | Absent | - |
| 23 | *C. laninae* | Present | 1. ClpB- Proteolysis in bacteria, ATP dependent protein chaperones, Type VI secretion system |
| 24 | *C. lari* | Present | 1. ClpB- Proteolysis in bacteria, ATP dependent protein chaperones, Type VI secretion system |
| 25 | *C. mucosalis* | Present | 1. ClpB- Proteolysis in bacteria, ATP dependent protein chaperones, Type VI secretion system |
| 26 | *C. novaezeelandiae* | Present | 1. Type VI secretion system Vgr family protein 2. Type VI secretion lipoprotein/VasD |
| 27 | *C. ornithocola* | Present | 1. type VI secretion system membrane subunit TssM 2. Hcp family type VI secretion system effector 3. type VI secretion system Vgr family protein 4. type IVB secretion system protein IcmH/DotU 5. type IVB secretion system protein IcmH/DotU 6. type VI secretion system lipoprotein TssJ 7. TssA family type VI secretion system protein 8. type VI secretion system contractile sheath small subunit 9. type VI secretion system contractile sheath small subunit 10. type VI secretion system baseplate subunit TssF 11. type VI secretion system baseplate subunit TssG" |
| 28 | *C.pinnipediorum* | Absent | - |
| 29 | *C. pleoridis* | Present | 1. type VI secretion system membrane subunit TssM 2. Hcp family type VI secretion system effector 3. type VI secretion system Vgr family protein 4. type IVB secretion system protein IcmH/DotU 5. type IVB secretion system protein IcmH/DotU 6. Type VI secretion system baseplate subunit TssK 7. Type VI secretion system lipoprotein TssJ 8. TssA family Type VI secretion system protein 9. Type VI secretion system contractile sheath small subunit 10. type VI secretion system contractile sheath large subunit 11. type VI secretion system baseplate subunit TssF 12. type VI secretion system baseplate subunit TssG |
| 30 | *C. rectus* | Present | 1. type VI secretion system baseplate subunit TssK 2. type VI secretion system lipoprotein TssJ 3. type VI secretion system domain-containing protein 4. type VI secretion system contractile sheath large subunit 5. type VI secretion system contractile sheath small subunit 6. type VI secretion system baseplate subunit TssF 7. type VI secretion system baseplate subunit TssG 8. Hcp family type VI secretion system effector 9. type VI secretion system Vgr family protein 10. Type VI secretion lipoprotein/VasD 11. T6SS component TssB (ImpB/VipA) 12. T6SS component TssC (ImpC/VipB) 13. T6SS component TssF (ImpG/VasA) 14. T6SS component TssG (ImpH/VasB) |
| 31 | *C. showae* | Present | 1. ClpB protein- Proteolysis in bacteria, ATP dependent protein chaperones, Type VI secretion system |
| 32 | *C. sputorum* |  | 1. ClpB protein- Proteolysis in bacteria, ATP dependent protein chaperones, Type VI secretion system |
| 33 | *C. subantracticus* | Present | 1. type VI secretion system membrane subunit TssM 2. Hcp family type VI secretion system effector 3. type VI secretion system Vgr family protein 4. type IVB secretion system protein IcmH/DotU 5. type VI secretion system baseplate subunit TssK 6. type VI secretion system lipoprotein TssJ 7. TssA family Type VI secretion system protein 8. type VI secretion system contractile sheath small subunit 9. type VI secretion system contractile sheath large subunit 10. type VI secretion system baseplate subunit TssF 11. type VI secretion system baseplate subunit TssG 12. ClpB protein- Proteolysis in bacteria, ATP dependent protein chaperones, Type VI secretion system 13. Outer membrane protein ImpK/VasF, OmpA/MotB domain 14. Uncharacterized protein ImpJ/VasE 15. Type VI secretion lipoprotein/VasD 16. Uncharacterized protein ImpA 17. Uncharacterized protein ImpB 18. Uncharacterized protein ImpC 19. Protein ImpG/VasA 20. Uncharacterized protein ImpH/VasB |
| 34 | *C. taniopygae* | Absent | - |
| 35 | *C. troglodytis* | Present | 1. T6SS component TssB (ImpB/VipA) |
| 36 | *C. upsaliensis* | Present | 1. ClpB protein- Proteolysis in bacteria, ATP dependent protein chaperones, Type VI secretion system |
| 37 | *C. ureolyticus* | Absent | - |
| 38 | *C. volucris* | Present | 1. ClpB protein- Proteolysis in bacteria, ATP dependent protein chaperones, Type VI secretion system |
| 39 | *C. vulpis* | Absent | - |
| 40 | *Candidates C. infans* | Absent | - |
| 41 | *C. analoticus* | Absent | - |
| 42 | *C. bilis* | Absent | - |
| 43 | *C. cryaerophilus* | Absent | - |
| 44 | *C. devanensis* | Absent | - |
| 45 | *C. magnus* | Absent | - |
| 46 | *C. majalis* | Absent | - |
| 47 | *C. massiliensis* | Absent | - |
| 48 | *C. procelli* | Absent | - |
| 49 | *C. suis* | Absent | - |
| 50 | *C. vicugnae* | Absent | - |

**Table 2. (SI)** The number of prophage regions and their types detected in different *Campylobacter* species**.**

| **S.N.** | **Species Name** | **Prophage** | **Intact region** | **Incomplete region** | **Questionable region** |
| --- | --- | --- | --- | --- | --- |
| 1 | *C. jejuni* | 1 | 0 | 1 | 0 |
| 2 | *C. blaseri* | 1 | 1 | 0 | 0 |
| 3 | *C. coli* | 2 | 2 | 0 | 0 |
| 4 | *C. concisus* | 1 | 1 | 0 | 0 |
| 5 | *C. corcagiensis* | 1 | 1 | 0 | 0 |
| 6 | *C. fetus* | 1 | 0 | 0 | 1 |
| 7 | *C. gracillis* | 2 | 2 | 0 | 0 |
| 8 | *C. helveticus* | 3 | 0 | 3 | 0 |
| 9 | *C. hepaticus* | 2 | 0 | 2 | 0 |
| 10 | *C. hominis* | 1 | 1 | 0 | 0 |
| 11 | *C. hyointstinalis* | 2 | 0 | 2 | 0 |
| 12 | *C. iguaniorum* | 5 | 1 | 2 | 2 |
| 13 | *C. insulanigrae* | 1 | 0 | 1 | 0 |
| 14 | *C. laninae* | 1 | 0 | 1 | 0 |
| 15 | *C. lari* | 4 | 0 | 4 | 0 |
| 16 | *C. mucosalis* | 1 | 0 | 1 | 0 |
| 17 | *C. novaezeelandiae* | 1 | 0 | 1 | 0 |
| 18 | *C. ornithocola* | 3 | 0 | 3 | 0 |
| 19 | *C. pinnipediorum* | 3 | 1 | 1 | 1 |
| 20 | *C. pleoridis* | 2 | 0 | 2 | 0 |
| 21 | *C. rectus* | 1 | 1 | 0 | 0 |
| 22 | *C. showae* | 4 | 0 | 4 | 0 |
| 23 | *C. sputorum* | 1 | 0 | 1 | 0 |
| 24 | *C. subantracticus* | 1 | 1 | 0 | 0 |
| 25 | *C. upsaliensis* | 1 | 0 | 1 | 0 |
| 26 | *C. volucris* | 1 | 0 | 1 | 0 |
| 27 | *Candidates C. infans* | 3 | 0 | 3 | 0 |

**Table 3. (SI)** An overview of the CRISPRs analysis of *Campylobacter* species.

| **Species** | **Confirmed CRISPRs** | **DR length** | **Spacer** | **Cas type** | **Cas gene** |
| --- | --- | --- | --- | --- | --- |
| *C. jejuni* | 1 | 23 | 1 | CAS type II C | Cas2_0_I-II-III, Cas1_0_II, Cas9_1_II |
| *C. portucalensis* | 1 | 25 | 1 | CAS  CAS typeIB | cas2_TypeI-II-III, cas4_TypeI-II, cas6_TypeI-III, cas3_TypeI, cas3_TypeI, cas5b2_TypeIB, cas7b2_TypeIB  cas1_TypeIB, cas5b2_TypeIB, cas7b2_TypeIB |
| *C. armoricus* | 1 | 36 | 6 | - | - |
| *C. blaseri* | 1 | 36 | 8 | CAS type II A | Cas9_0_II, Cas1_0_II,Cas2_0_I-II-III, Csn2_0_IIA |
| *C. canadensis* | 4 | 37-36 | 21+12+4+5= 42 | CAS | Cas1_0_I-II-III, Cas2_0_I-II-III-V, Cas4_0_I-II |
| *C. coli* | 4 | 25-28 | 3+3+3= 9 | CAS type IIC | Cas3_1_I, Cas9_0_II |
| *C. cuniculorum* | 1 | 36 | 29 | CAS type IIC | Cas9_0_II, Cas1_0-II, Cas2_0_I-II-III |
| *C. curvus* | 2 | 30 | 12+3=15 | CAS type IB | Cas7_1_IB, Cas5_0_IB, Cas3_0_I, Cas4_0_I-II,Cas2_0-I-II-III, Cas1_0_I-II-III-V |
| *C. fetus* | 2 | 30 | 23+21=44 | CAS type IB | Cas6_0_I-III, Cas7_3_IB, Cas5_1_IB, Cas3_0_1, Cas4_0_I-II, Cas1_0_I-II-III, Cas2_0_I-II-III-V |
| *C. geochelonsis* | 1 | 30 | 78 | CAS type IIID | Csm3_0_IIIAD, Csm3_0_IIID, Csm3_0_IIID, Cas10_0_III |
| *C. gracillis* | 3 | 30-37 | 41+51+3=95 | CAS | Cas6_0_III, Cas1_0-I-II-III, Cas2_0-I-II-III-V |
| *C. hominis* | 1 | 30 | 71 | CAS type IB | Cas2_0-I-II-III-V, Cas1_0_I-II, Cas5_1_IB, Cas7_2_IB, Cas6_0_I-III |
| *C. iguaniorum* | 1 | 30 | 7 | CAS type IB | Cas6_0_I-III, Cas7_2_IB, Cas5_I_IB, Cas3_0_I,Cas4-0-I-II, Cas2_0_I-II-III, Cas1_0_I-II-III |
| *C. laninae* | 1 | 37 | 18 | CAS | Cas1_0_I-II-III, Cas2_0_I-II-III-V, Cas4_0_I-II |
| *C. pleoridis* | 1 | 36 | 11 | CAS type IIU | Cas9_1_II, Cas1_0_II, Cas2_0_I-II-III |
| *C. rectus* | 4 | 27-30 | 31+3+14+52= 100 | CAS type III D | Csm3_0_IIIAD, Csm3_1_IIIAD, Csm3_0_IIID, Cas10_0_III |
| *C. showae* | 1 | 30 | 13 | CAS type IB | Cas1_0_I-II-III-V, Cas2_0_I-II-III, Cas4_0_II, Cas3_0_I, Cas5_1_IB, Cas7_2_IB, Cas8a1_I-IB |
| *C. sputorum* | 1 | 30 | 36 | CAS type IB | Cas1_0_I-II-III, Cas2_0_I-II-III, Cas4_0_I-II, Cas3_0_I, Cas5_1_IB, Cas7_2_IB, Cas6_0_I-III |
| *Candidates C. infans* | 1 | 38 | 22 | CAS type IIB | Cas4_0_I-II, Cas2_0_I-II-III-V, Cas1_0_I-II-III, Cas9_0_IIB |
| *C. analoticus* | 1 | 25 | 1 | - | - |
| *C. bilis* | 1 | - | 2+1= 3 | CAS  CAS- type IIU | cas2_TypeI-II-III, cas1_TypeII,  cas1_TypeII |
| *C. cryaerophila* | 1 | 29 | 1 | - | - |
| *C. devanensis* | 5 | 23 | 9 | CAS-TypeIIB | cas4_TypeI-II, cas2_TypeI-II-III,  cas1_TypeI-II-III,  cas9_TypeIIB |
| *C. magnus* | 9 | 23 | 10 | - | - |
| *C. majalis* | 1 | 24 | 1 | - | - |
| *C. massiliensis* | 2 | 47 | 46 | CAS-TypeIB | cas7b2_TypeIB, cas5b2_TypeIB, cas3_TypeI, cas4_TypeI-II, cas2_TypeI-II-III, cas1_TypeIB |
| *C. procelli* | 5 | 153 | 6 | CAS-TypeIIB | cas4_TypeI-II, cas2_TypeI-II-III, cas1_TypeI-II-III, cas9_TypeIIB |
| *C. vicugnae* | 2 | 73 | 20 | CAS-TypeIIU | cas9_TypeII, cas1_TypeII, cas2_TypeI-II-III |
